# Supplementary material for: The Effects of Different Roasting Methods on the Phenolic Contents, Antioxidant Potential, and In Vitro Inhibitory Activities of Sacha Inchi Seeds
Source: MDPI journal article supplement (doi:10.3390/foods12224178), 2023-11-20
Supplement: s1 [file s1]

## Supplementary Materials

### The Effects of Different Roasting Methods on the Phenolic Contents, Antioxidant Potential, and In Vitro Inhibitory Activities of Sacha Inchi Seeds

Suwapat Kittibunchakul <sup>1</sup>, Varongsiri Kemsawasd <sup>1</sup>, Chatrapa Hudthagosol <sup>2</sup>, Promluck Sanporkha <sup>2</sup>, Suwimol Sapwarobol <sup>3</sup> and Uthaiwan Suttisansanee <sup>1,\*</sup>

<sup>1</sup> Food and Nutrition Academic and Research Cluster, Institute of Nutrition, Mahidol University, Salaya, Phuttamonthon, Nakhon Pathom 73170, Thailand; suwapat.kit@mahidol.ac.th (S.K.); varongsiri.kem@mahidol.ac.th (V.K.); uthaiwan.sut@mahidol.ac.th (U.S.)

<sup>2</sup> Faculty of Public Health, Mahidol University, Ratchathewi, Bangkok 10400, Thailand; chatrapa.hud@mahidol.ac.th (C.H.); promluck.san@mahidol.ac.th (P.S.)

<sup>3</sup> Faculty of Allied Health Sciences, Chulalongkorn University, Pathumwan, Bangkok 10330, Thailand; suwimol.sa@chula.ac.th (S.S.)

\* Correspondence: uthaiwan.sut@mahidol.ac.th

**Table S1.** Proximate composition of raw sacha inchi seeds

| Nutrients              | Amounts per 100 g of fresh matter |
|------------------------|-----------------------------------|
| Energy (kcal)          | 559.83 ± 14.82                    |
| Moisture (g)           | 6.79 ± 0.23                       |
| Protein (g)            | 25.54 ± 0.52                      |
| Total fat (g)          | 37.43 ± 1.14                      |
| Total carbohydrate (g) | 27.95 ± 0.62                      |
| Ash (g)                | 3.14 ± 0.17                       |

The proximate composition was analyzed using the standard protocols of the Association of Official Analytical Chemists (AOAC). All data are shown as mean ± SD of triplicate experiments.

**Table S2.** Moisture contents and color values of raw and roasted sachu inchi seed samples

| Measurements         | Sachu inchi seeds |              |              |              |
|----------------------|-------------------|--------------|--------------|--------------|
|                      | Raw               | Roasted-CP   | Roasted-VO   | Roasted-TD   |
| Moisture content (%) | 7.04 ± 0.23       | 0.88 ± 0.04  | 1.05 ± 0.04  | 1.30 ± 0.04  |
| L*                   | 56.21 ± 0.12      | 43.66 ± 0.16 | 46.49 ± 0.05 | 50.45 ± 0.26 |
| a*                   | 6.69 ± 0.05       | 13.80 ± 0.04 | 11.87 ± 0.00 | 11.79 ± 0.13 |
| b*                   | 23.27 ± 0.18      | 24.22 ± 0.03 | 22.71 ± 0.13 | 25.19 ± 0.55 |

The moisture content was determined using a moisture analyzer (Model FD-720, Kett Electric Laboratory, Tokyo, Japan). The color was analyzed using a ColorFlex EZ spectrophotometer (Hunter Associates Laboratory, Reston, VA, USA), and reported in terms of CIELAB units. All data are shown as mean ± SD of triplicate experiments. Roasted samples were obtained by roasting sachu inchi seeds in cooking pan (CP), vacuum oven (VO) and hot-air tray dryer (TD). L\*, a\*, and b\* indicate relative lightness/darkness, redness/greenness and yellowness/blueness of the samples, respectively.

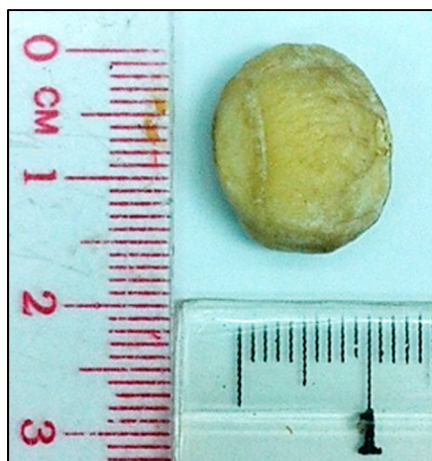

**Figure S1.** Physical appearance of raw sachachi seeds
